# Supplementary material for: Hemodynamic differences between women and men with elevated blood pressure in China: A non-invasive assessment of 45,082 adults using impedance cardiography
Source: PLOS journal article supplement (doi:10.1371/journal.pone.0269777), 2022-06-14
Supplement: S2 (10.1371/journal.pone.0269777.s002) [file journal.pone.0269777.s002]

**S2 Figure.** Cardiac Output and Cardiac Index Density Plots Overlap Between Women and Men with Systolic Blood Pressure  $\geq 140$  mmHg or Diastolic Blood Pressure  $\geq 90$  mmHg, by Age Category.

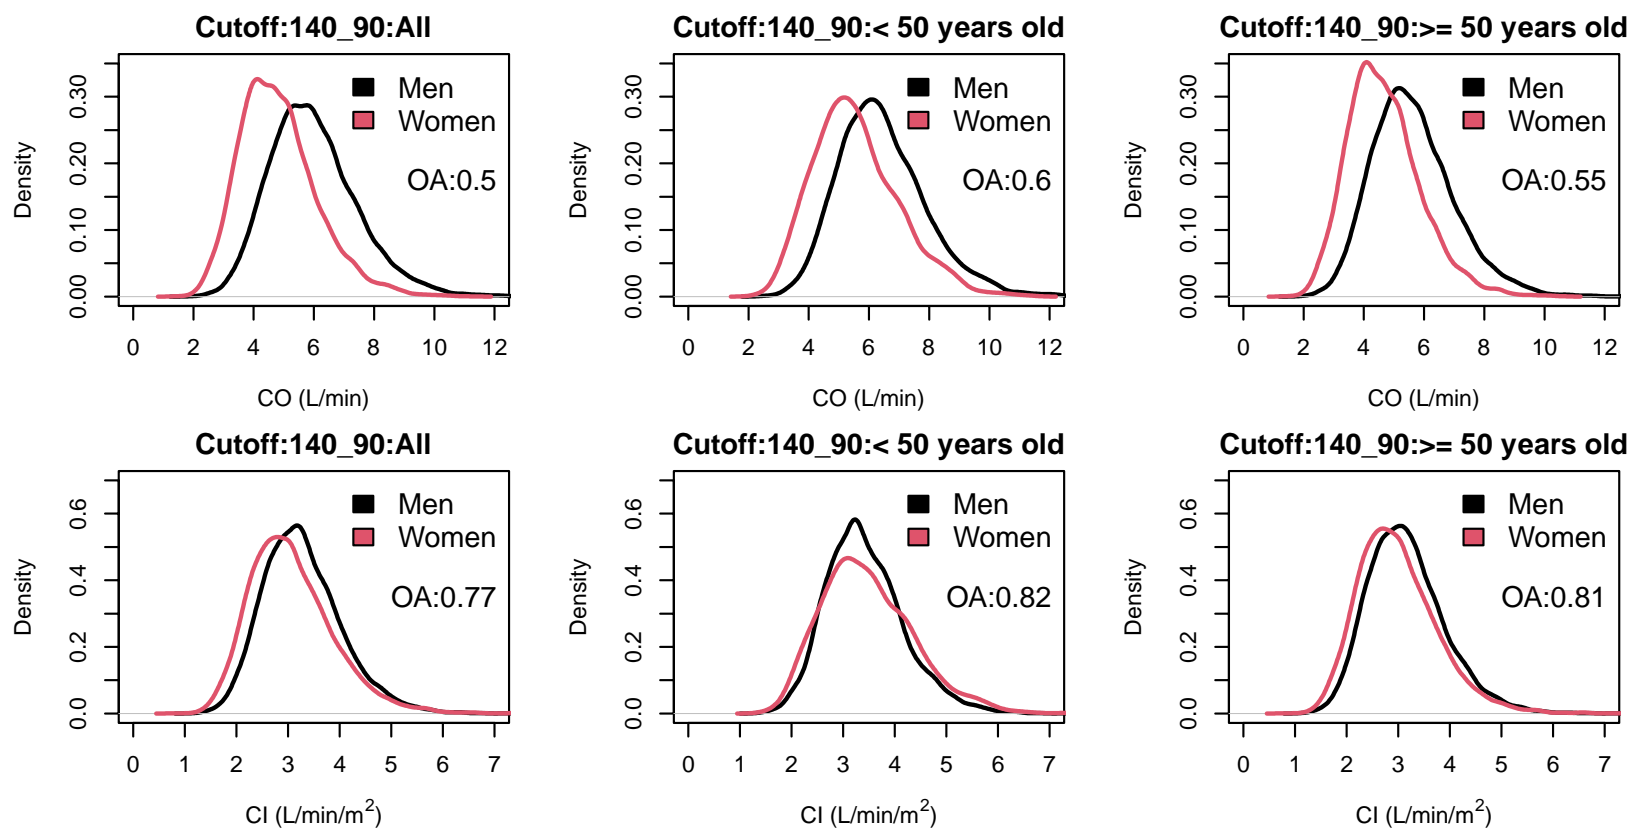

CO, cardiac output; CI, cardiac index; OA, overlapping area.
